# Supplementary material
Source: PubMed Central journal article supplement (PMC7450748)
Supplement: JGMED19008031.pdf [file JGMED19008031.pdf]

**Appendix 1. Data extraction spreadsheet completed by each of the 15 participating Canadian emergency medicine residency training programs.**

Note: Please be sure to write over the example rows below when you enter the data.

| Trainee #                  | Site   | PGY year | Gender         | 1        | 2        |
|----------------------------|--------|----------|----------------|----------|----------|
| e.g. 123                   | School |          | 1 M            | 0        | 0        |
| e.g.456                    | School |          | 1 F            | 0        | 0        |
| Space Holder               | School | PGY      | Write M/F here |          |          |
| Space Holder               | School | PGY      | Write M/F here |          |          |
| Space Holder               | School | PGY      | Write M/F here |          |          |
| Space Holder               | School | PGY      | Write M/F here |          |          |
| Space Holder               | School | PGY      | Write M/F here |          |          |
| Space Holder               | School | PGY      | Write M/F here |          |          |
| Space Holder               | School | PGY      | Write M/F here |          |          |
| Space Holder               | School | PGY      | Write M/F here |          |          |
| Space Holder               | School | PGY      | Write M/F here |          |          |
| <b>Total EPAs w/ score</b> |        |          |                | <b>0</b> | <b>0</b> |
| Average                    |        |          |                | 0        | 0        |
| SD                         |        |          |                | 0.00     | 0.00     |
| Median                     |        |          |                | 0        | 0        |
| First Quartile             |        |          |                | #NUM!    | #NUM!    |
| Last Quartile              |        |          |                | #NUM!    | #NUM!    |
| IQR (25-75%)               |        |          |                | #NUM!    | #NUM!    |

TD1 (R)

















| C4 (Providing PSA) |       |       |       |  | C5 (Med or Surg Con) |       |       |  |       |
|--------------------|-------|-------|-------|--|----------------------|-------|-------|--|-------|
| 2                  | 3     | 4     | 5     |  | 1                    | 2     | 3     |  |       |
| 0                  | 0     | 0     | 0     |  | 0                    | 0     | 0     |  |       |
| 0                  | 0     | 0     | 0     |  | 0                    | 0     | 0     |  |       |
| 0                  | 0     | 0     | 0     |  | 0                    | 0     | 0     |  |       |
| 0                  | 0     | 0     | 0     |  | 0                    | 0     | 0     |  |       |
| 0                  | 0     | 0     | 0     |  | 0                    | 0     | 0     |  |       |
| 0                  | 0     | 0     | 0     |  | 0                    | 0     | 0     |  |       |
| 0.00               | 0.00  | 0.00  | 0.00  |  | 0.00                 | 0.00  | 0.00  |  | 0.00  |
| 0                  | 0     | 0     | 0     |  | 0                    | 0     | 0     |  | 0     |
| #NUM!              | #NUM! | #NUM! | #NUM! |  | #NUM!                | #NUM! | #NUM! |  | #NUM! |
| #NUM!              | #NUM! | #NUM! | #NUM! |  | #NUM!                | #NUM! | #NUM! |  | #NUM! |
| #NUM!              | #NUM! | #NUM! | #NUM! |  | #NUM!                | #NUM! | #NUM! |  | #NUM! |









| C11 (Risk of Exposure / Violence) |       |       |       |  | C12 (Liaising w/ Preh) |       |       |  |  |
|-----------------------------------|-------|-------|-------|--|------------------------|-------|-------|--|--|
| 2                                 | 3     | 4     | 5     |  | 1                      | 2     | 3     |  |  |
| 0                                 | 0     | 0     | 0     |  | 0                      | 0     | 0     |  |  |
| 0                                 | 0     | 0     | 0     |  | 0                      | 0     | 0     |  |  |
| 0                                 | 0     | 0     | 0     |  | 0                      | 0     | 0     |  |  |
| 0                                 | 0     | 0     | 0     |  | 0                      | 0     | 0     |  |  |
| 0                                 | 0     | 0     | 0     |  | 0                      | 0     | 0     |  |  |
| 0.00                              | 0.00  | 0.00  | 0.00  |  | 0.00                   | 0.00  | 0.00  |  |  |
| 0                                 | 0     | 0     | 0     |  | 0                      | 0     | 0     |  |  |
| #NUM!                             | #NUM! | #NUM! | #NUM! |  | #NUM!                  | #NUM! | #NUM! |  |  |
| #NUM!                             | #NUM! | #NUM! | #NUM! |  | #NUM!                  | #NUM! | #NUM! |  |  |
| #NUM!                             | #NUM! | #NUM! | #NUM! |  | #NUM!                  | #NUM! | #NUM! |  |  |







| (End-of-life Care) |       |       | TP1 (Optimize Flow) |       |       |  |
|--------------------|-------|-------|---------------------|-------|-------|--|
| 3                  | 4     | 5     | 2                   | 3     | 4     |  |
| 0                  | 0     | 0     | 0                   | 0     | 0     |  |
| 0                  | 0     | 0     | 0                   | 0     | 0     |  |
| 0                  | 0     | 0     | 0                   | 0     | 0     |  |
| 0                  | 0     | 0     | 0                   | 0     | 0     |  |
| 0.00               | 0.00  | 0.00  | 0.00                | 0.00  | 0.00  |  |
| 0                  | 0     | 0     | 0                   | 0     | 0     |  |
| #NUM!              | #NUM! | #NUM! | #NUM!               | #NUM! | #NUM! |  |
| #NUM!              | #NUM! | #NUM! | #NUM!               | #NUM! | #NUM! |  |
| #NUM!              | #NUM! | #NUM! | #NUM!               | #NUM! | #NUM! |  |







| TP6 (Dealing w/ Uncertainty) |       |       |       |       |       |
|------------------------------|-------|-------|-------|-------|-------|
| 1                            | 2     | 3     | 4     | 5     |       |
| 0                            | 0     | 0     | 0     | 0     | 0     |
| 0                            | 0     | 0     | 0     | 0     | 0     |
| 0                            | 0     | 0     | 0     | 0     | 0     |
| 0                            | 0     | 0     | 0     | 0     | 0     |
| 0                            | 0     | 0     | 0     | 0     | 0     |
| 0.00                         | 0.00  | 0.00  | 0.00  | 0.00  | 0.00  |
| 0                            | 0     | 0     | 0     | 0     | 0     |
| #NUM!                        | #NUM! | #NUM! | #NUM! | #NUM! | #NUM! |
| #NUM!                        | #NUM! | #NUM! | #NUM! | #NUM! | #NUM! |
| #NUM!                        | #NUM! | #NUM! | #NUM! | #NUM! | #NUM! |

**TABLE**

The O-SCORE and University of Toronto Entrustment Scales Used to Assess Each Entrustable Professional Activity

| <b>Rating</b> | <b>O-SCORE</b>                    | <b>Toronto Entrustment Scale</b>                     |
|---------------|-----------------------------------|------------------------------------------------------|
| <b>1</b>      | I had to do                       | Somebody else had to complete all or part            |
| <b>2</b>      | I had to talk them through        | Required major instruction                           |
| <b>3</b>      | I needed to prompt                | Required some minor advice                           |
| <b>4</b>      | I needed to be there just in case | Supervisor didn't need to be there                   |
| <b>5</b>      | I didn't need to be there         | Demonstrated leading practice, acted as a role model |
